# Supplementary material
Source: PubMed Central journal article supplement (PMC9731518)
Supplement: NIHMS1852324-supplement-Supplementary_Material.pdf [file NIHMS1852324-supplement-Supplementary_Material.pdf]

1        **Supplementary Data**

2        **Quantitation of the ATR inhibitor elimusertib (BAY-1895344)**  
3                **in human plasma by LC-MS/MS**

4  
5 Brian Kiesel<sup>1,2</sup>, Robert A. Parise<sup>1</sup>, Anuradha Krishnamurthy<sup>3</sup>, Steven Gore<sup>4</sup>, Jan H. Beumer<sup>1,2,3</sup>

6  
7 <sup>1</sup>Cancer Therapeutics Program, UPMC Hillman Cancer Center, Pittsburgh, PA

8 <sup>2</sup>Department of Pharmaceutical Sciences, School of Pharmacy, University of Pittsburgh,  
9 Pittsburgh, PA

10 <sup>3</sup>Division of Hematology-Oncology, Department of Medicine, University of Pittsburgh School of  
11 Medicine, Pittsburgh, PA

12 <sup>4</sup>Investigational Drug Branch, Cancer Therapy Evaluation Program, Division of Cancer Treatment  
13 and Diagnosis, National Cancer Institute, Bethesda, MD

14  
15 Correspondence to:

16        Jan H. Beumer, PharmD, PhD, DABT

17        UPMC Hillman Cancer Center

18        Room G27E, Hillman Research Pavilion, 5117 Centre Avenue

19        Pittsburgh, PA 15213-1863, USA

20        Tel.: +1-412-623-3216

21        Fax.: +1-412-623-1212

22        Email: beumerj@gmail.com

23  
24

25

26 **Suppl.Table 1. Assay performance data of the calibration samples for elimusertib in human**  
27 **plasma.**

| Conc.<br>(ng/mL) | Intra-assay<br>Accuracy<br>(%) | Inter-assay<br>Accuracy<br>(%) | Intra-assay<br>precision<br>(%) | Inter-assay<br>precision<br>(%) |
|------------------|--------------------------------|--------------------------------|---------------------------------|---------------------------------|
| 30               | 95.7-100.7                     | 98.3                           | 4.7                             | *                               |
| 50               | 97.9-103.2                     | 100.2                          | 5.2                             | *                               |
| 100              | 104.0-114.3                    | 108.2                          | 5.1                             | 4.1                             |
| 300              | 98.7-104.8                     | 101.3                          | 3.0                             | 2.6                             |
| 500              | 92.5-105.5                     | 99.2                           | 3.5                             | 6.3                             |
| 1000             | 103.7-111                      | 107.9                          | 2.9                             | 3.1                             |
| 3000             | 96.0-101.4                     | 99.4                           | 3.7                             | 2.1                             |
| 5000             | 91.0-97.9                      | 93.5                           | 2.2                             | 3.9                             |

28 n=9; triplicate results, each in 3 separate runs, for each concentration. \*The mean square of the  
29 within runs was greater than the mean square of the between runs, indicating that there was no  
30 significant additional variation due to the performance of the assay in different runs ([Rosing, et al.](#)  
31 [2000](#)).  
32

33

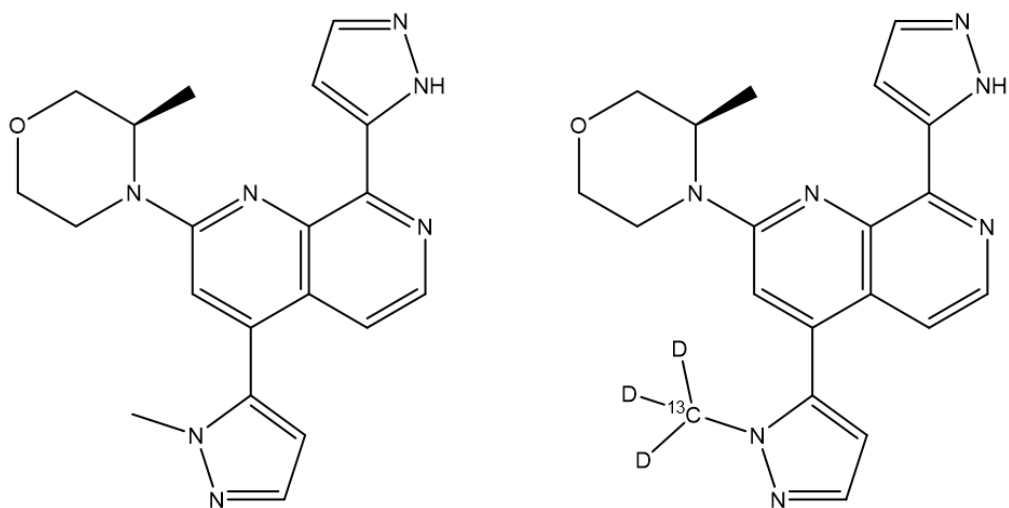

34

35 **Suppl.Fig. 1. Chemical structures of A) elimusertib and B) [<sup>13</sup>C,<sup>2</sup>H<sub>3</sub>]-elimusertib.**

36

37

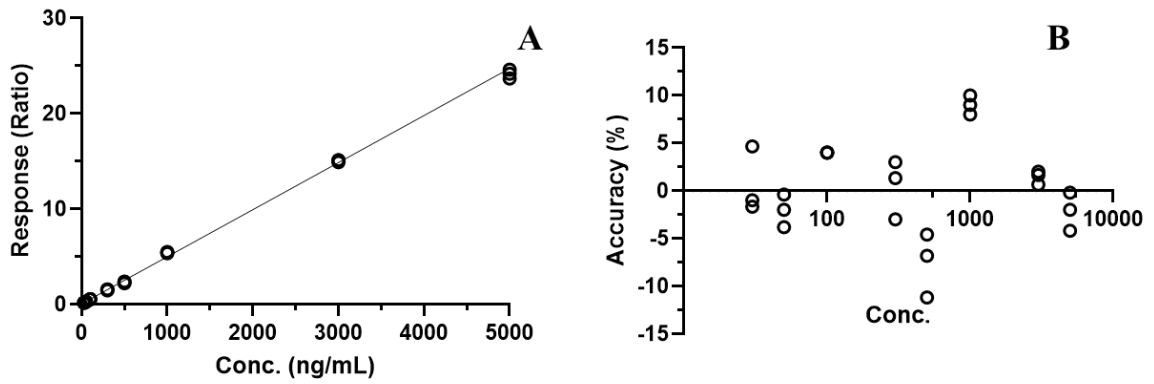

38

39 **Suppl.Fig. 2. Representative calibration curve (N=3 for each concentration) of elimusertib**  
40 **in human plasma (response elimusertib=  $0.00494 \cdot \text{conc} + .0284$ ;  $R^2=0.9984$ ). A) Calibration**  
41 **curve is depicted as response ratio versus nominal concentration; B) as residuals (%) of the**  
42 **back-calculated relative to the nominal concentrations versus the log transformed**  
43 **concentration.**

44

45

46

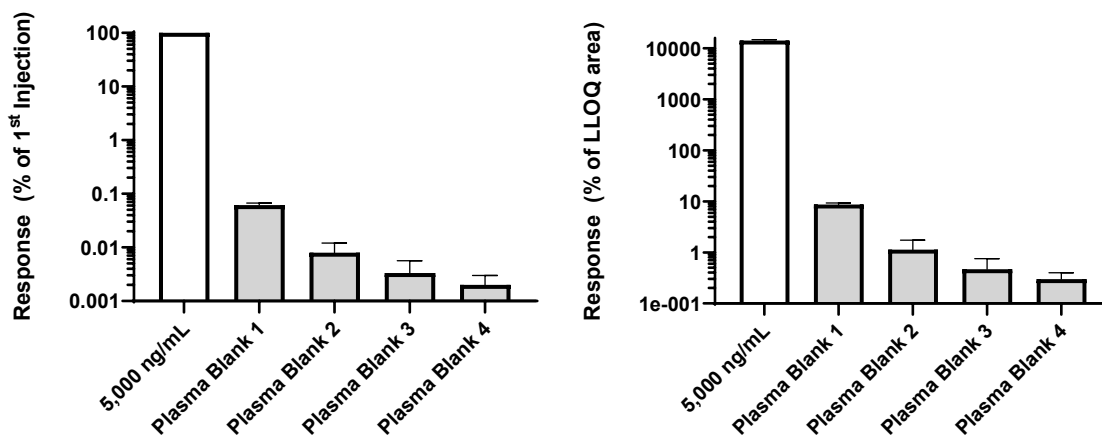

47

48 **Suppl.Fig. 3. Analytical carry-over of elimusertib described in serial blank human plasma**  
49 **sample injections following a 5,000 ng/mL spiked plasma sample represented as the mean**  
50 **percent analyte response relative to the 5,000 ng/mL response (error bars represent ± 1 SD),**  
51 **and the same data expressed as % of the LLOQ area.**

52

53

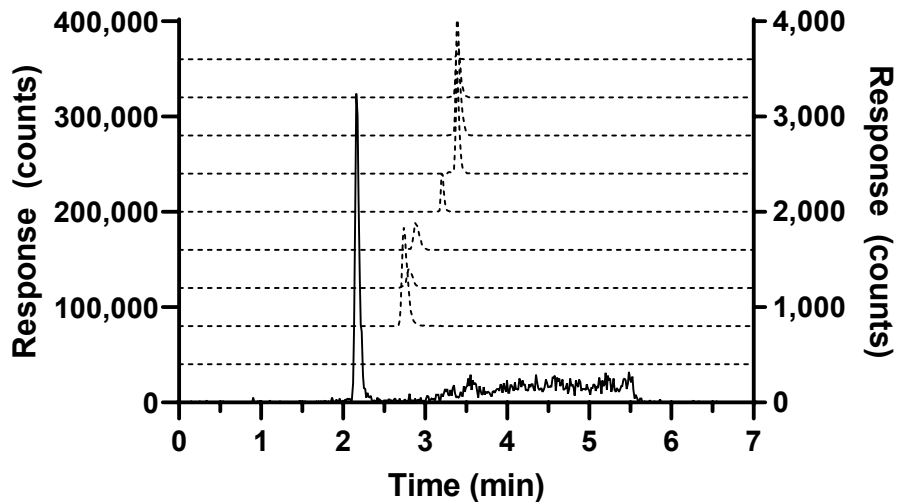

54

55 **Suppl.Fig. 4. Chromatogram of elimusertib HQC (bottom trace corresponding with right y-**  
56 **axis) with selected phospholipid MRM channels (left y-axis). For visual purposes**  
57 **phospholipid MRM channels were offset from baseline response in increments of 40,000**  
58 **response counts and, from top trace, MRM channels were as follows: 806>184, 784>184,**  
59 **760>184, 758>184, 704>184, 524>184, 522>184, 496>184, 184>184.**

60
